# Supplementary material for: Application of Au@Pt Nanozyme as Enhancing Label for the Sensitive Lateral Flow Immunoassay of Okadaic Acid
Source: MDPI journal article supplement (doi:10.3390/bios12121137), 2022-12-07
Supplement: s1 [file biosensors-2045449-supplementary.pdf › biosensors-2045449-supplementary.pdf]

Supporting Information

# Application of Au@Pt Nanozyme as Enhancing Label for the Sensitive Lateral Flow Immunoassay of Okadaic Acid

Olga D. Hendrickson <sup>1</sup>, Elena A. Zvereva <sup>1</sup>, Vasily G. Panferov <sup>1</sup>, Olga N. Solopova <sup>2</sup>, Anatoly V. Zherdev <sup>1</sup>, Peter G. Sveshnikov <sup>3</sup>, and Boris B. Dzantiev <sup>1,\*</sup>

<sup>1</sup> Bach Institute of Biochemistry, Research Center of Biotechnology of the Russian Academy of Sciences, Leninsky Prospect 33, 119071 Moscow, Russia

<sup>2</sup> Blokhin National Medical Research Center of Oncology, Ministry of Health of the Russian Federation, Kashirskoye Shosse 24, 115478 Moscow, Russia

<sup>3</sup> Russian Research Center for Molecular Diagnostics and Therapy, Sympheropolsky Blvd., 8, 117638 Moscow, Russia

\* Correspondence: dzantiev@inbi.ras.ru; Tel.: +7-4959543142

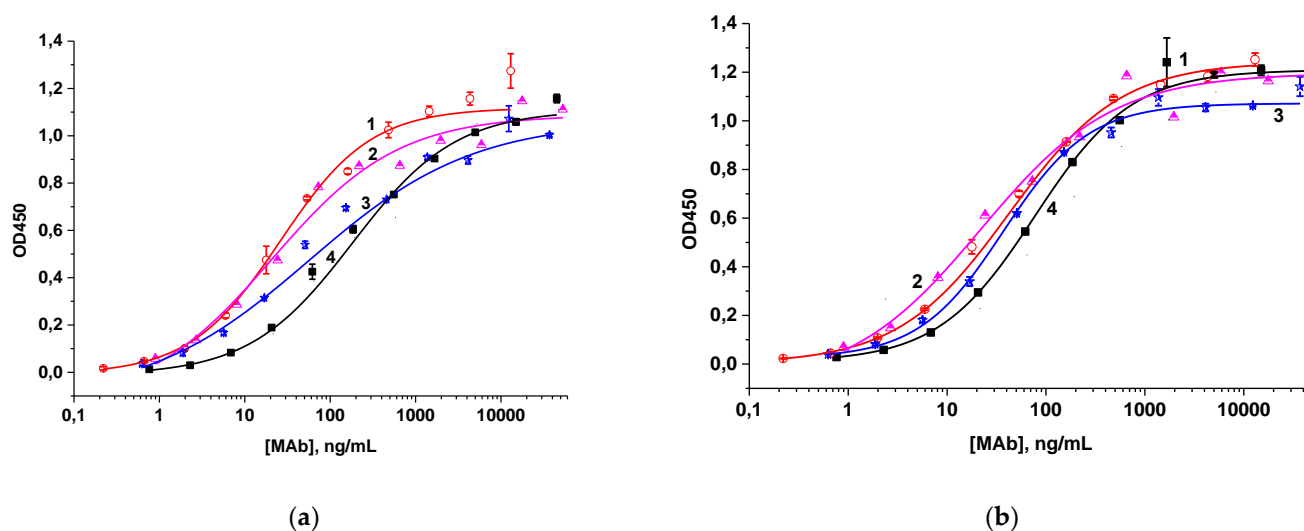

**Figure S1.** Dependences of OD<sub>450</sub> on MAb concentrations in the ELISA with immobilized OA-STI (a) and OA-BSA (b) for clones Okad H1 (1), Okad B4 (2), Okad C2 (3), and Okad D6 (4).

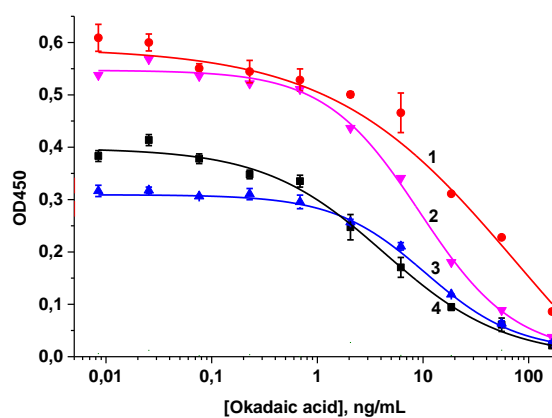

(a)

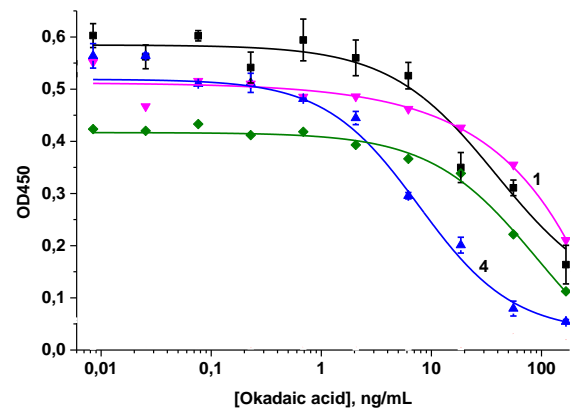

(b)

**Figure S2.** Calibration curves of OA in the ELISA with immobilized OA-STI (a) and OA-BSA (b) for clones Okad H1 (1) Okad B4 (2), Okad C2 (3), and Okad D6 (4).

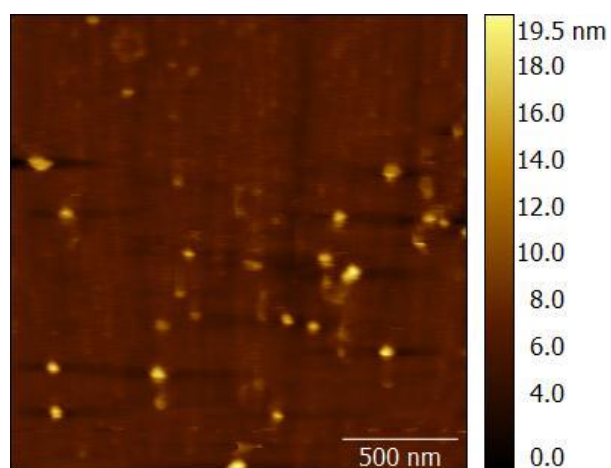

(a)

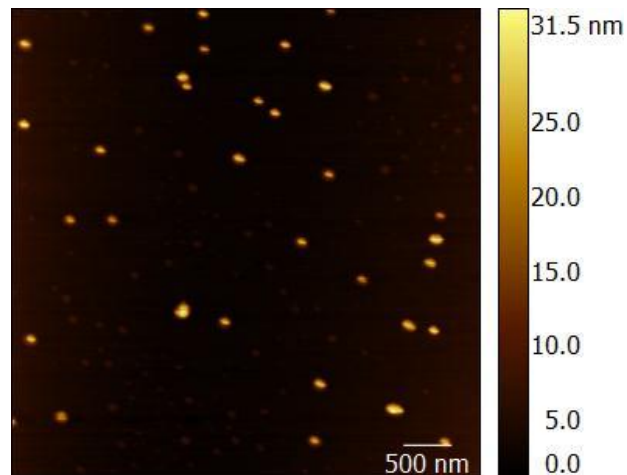

(b)

**Figure S3.** ASM images of AuNPs (a) and Au@Pt nanozyme (b).

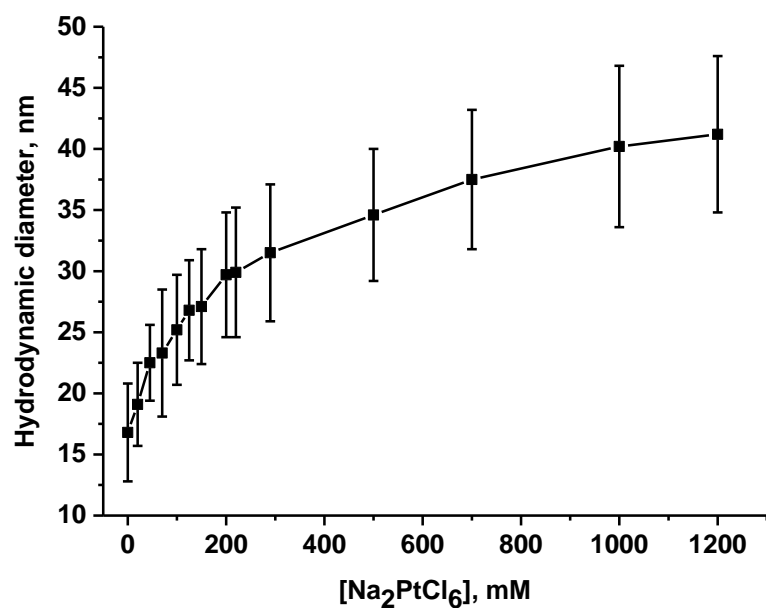

**Figure S4.** Dependence of the hydrodynamic diameter of Au@Pt nanozyme on Na<sub>2</sub>PtCl<sub>6</sub> concentration in the reaction mixture measured by DLS.

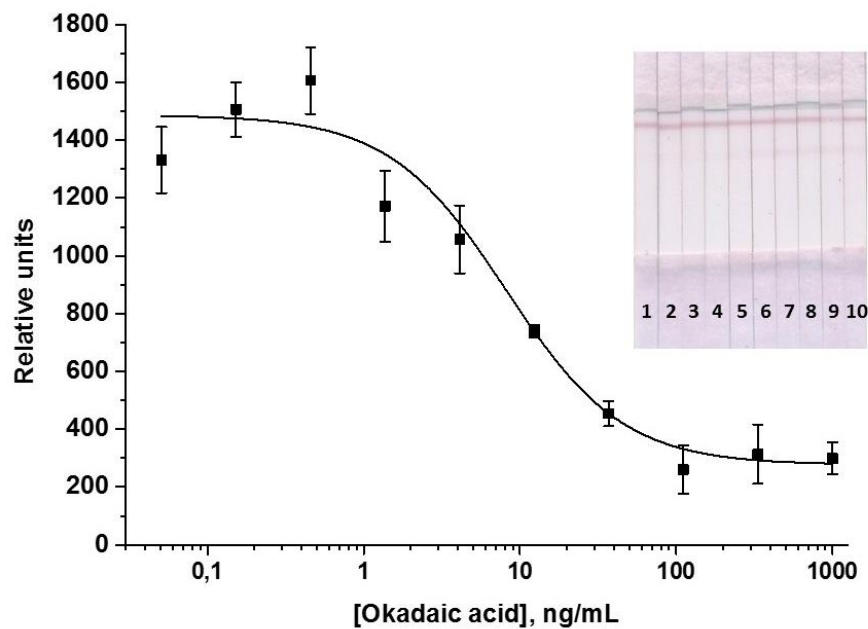

**Figure S5.** Calibration curve of OA in the standard LFIA with AuNPs and the images of the test strips. The following OA concentrations were detected (ng/mL): 1000 (1), 333 (2), 111 (3), 37 (4), 12.3 (5), 4.1 (6), 1.4 (7), 0.45 (8), 0.15 (9), 0.05 (10).

**Table S1.** Composition of the substrates used in the study and the results of their application in the enhanced LFIA.

| N  | Substrate Composition                                                                                     | Signal Amplification | Background in the Zero Point (with No Specific MABs) | Background Coloration of the Working Membrane |
|----|-----------------------------------------------------------------------------------------------------------|----------------------|------------------------------------------------------|-----------------------------------------------|
| 1  | TMB-based commercial substrate mixture                                                                    | yes                  | yes                                                  | Strong, uneven                                |
| 2  | 0.05% DAB, 0.02% CoCl <sub>2</sub> ·6H <sub>2</sub> O, 0.03% H <sub>2</sub> O <sub>2</sub> in PBS, pH 7.4 | yes                  | no                                                   | Strong, uneven                                |
| 3  | 0.05% DAB, 0.02% CoCl <sub>2</sub> ·6H <sub>2</sub> O, 0.06% H <sub>2</sub> O <sub>2</sub> in PBS, pH 7.4 | yes                  | no                                                   | Strong, uneven                                |
| 4  | 0.05% DAB, 0.01% CoCl <sub>2</sub> ·6H <sub>2</sub> O, 0.03% H <sub>2</sub> O <sub>2</sub> in PBS, pH 7.4 | yes                  | no                                                   | Strong, uneven                                |
| 5  | 0.05% DAB, 0.03% H <sub>2</sub> O <sub>2</sub> in PBS, pH 7.4                                             | yes                  | no                                                   | Average, uneven                               |
| 6  | 0.05% DAB, 0.05% NiCl <sub>2</sub> , 0.7% H <sub>2</sub> O <sub>2</sub> in PBS, pH 7.2                    | yes                  | no                                                   | Strong, uneven                                |
| 7  | 0.05% DAB, 0.03% NiCl <sub>2</sub> , 0.7% H <sub>2</sub> O <sub>2</sub> in PBS, pH 7.2                    | yes                  | no                                                   | Strong, uneven                                |
| 8  | 0.05% DAB, 0.02% NiCl <sub>2</sub> , 0.7% H <sub>2</sub> O <sub>2</sub> in PBS, pH 7.2                    | yes                  | no                                                   | Strong, uneven                                |
| 9  | 0.05% DAB, 0.01% NiCl <sub>2</sub> , 0.7% H <sub>2</sub> O <sub>2</sub> in PBS, pH 7.2                    | yes                  | no                                                   | Average, uneven                               |
| 10 | 0.05% DAB, 0.015% H <sub>2</sub> O <sub>2</sub> in PBS, pH 7.2                                            | yes                  | no                                                   | Average, even                                 |
